# Supplementary material
Source: publisher site journal article supplement (https://www.dovepress.com/get_supplementary_file.php?f=supplementary_file_6_51969.pdf)
Supplement: Supplementary file 1 [file get_supplementary_file.php]

**Table S6. The significant difference in overall survival (p values < 0.05) in the sensitive patient group**

|    | p-value   | UniqueID        | Overall survival ( Log-rank p < 0.05) |
|----|-----------|-----------------|---------------------------------------|
| 1  | 6.07E-05  | hsa-miR-454*    | 0.000                                 |
| 2  | 0.0002439 | hsa-miR-125b-1* | 0.032                                 |
| 3  | 0.0005004 | hsa-miR-422a    |                                       |
| 4  | 0.0005008 | hsa-miR-193b*   | 0.000                                 |
| 5  | 0.0010034 | hsa-miR-921     | 0.024                                 |
| 6  | 0.001864  | hsa-miR-628-3p  |                                       |
| 7  | 0.0025425 | hsa-miR-198     |                                       |
| 8  | 0.0030151 | hsa-miR-766     | 0.018                                 |
| 9  | 0.0032009 | hsa-miR-185*    |                                       |
| 10 | 0.0032192 | hcmv-miR-UL148D |                                       |
| 11 | 0.0036373 | hsa-miR-515-5p  | 0.012                                 |
| 12 | 0.0038446 | hsa-miR-302a    | 0.004                                 |
| 13 | 0.0040335 | hsa-miR-614     |                                       |
| 14 | 0.0041039 | ebv-miR-BART7   |                                       |
| 15 | 0.0041568 | hsa-miR-652     |                                       |
| 16 | 0.0041898 | hsa-miR-32*     | 0.013                                 |
| 17 | 0.0044022 | hsa-miR-659     |                                       |
| 18 | 0.0050447 | hsa-miR-197     |                                       |
| 19 | 0.0051793 | hsa-miR-211     | 0.003                                 |
| 20 | 0.0058854 | hsa-miR-326     | 0.002                                 |
| 21 | 0.0061593 | hsa-miR-613     |                                       |
| 22 | 0.0062662 | hsa-miR-519e*   |                                       |
| 23 | 0.00637   | hsa-miR-1238    |                                       |
| 24 | 0.0066029 | hsa-miR-148a    | 0.005                                 |
| 25 | 0.0071719 | hsa-miR-657     |                                       |
| 26 | 0.007457  | hsa-miR-634     |                                       |
| 27 | 0.0074662 | hsa-miR-943     |                                       |
| 28 | 0.0076689 | hsa-miR-328     |                                       |
| 29 | 0.008927  | hcmv-miR-US5-1  | 0.030                                 |
| 30 | 0.0101611 | hsa-miR-7-2*    |                                       |
| 31 | 0.0103711 | hsa-miR-615-3p  | 0.016                                 |
| 32 | 0.0104816 | hsa-miR-574-3p  |                                       |
| 33 | 0.0108911 | hsa-miR-937     |                                       |
| 34 | 0.010908  | hsa-miR-454     |                                       |
| 35 | 0.0110915 | hsa-miR-744*    |                                       |
| 36 | 0.0117025 | hsa-let-7b*     |                                       |
| 37 | 0.0118246 | hsa-miR-26a-1*  |                                       |
| 38 | 0.0118439 | hsa-miR-483-3p  |                                       |
| 39 | 0.0131633 | hsa-miR-135b    | 0.007                                 |
| 40 | 0.0131802 | hsa-miR-136     | 0.045                                 |
| 41 | 0.0137986 | hsa-miR-551b*   |                                       |
| 42 | 0.0139958 | hsa-miR-1236    |                                       |
| 43 | 0.0143688 | hsa-miR-541     |                                       |
| 44 | 0.0144229 | hsa-miR-130a*   |                                       |
| 45 | 0.0144847 | hsa-miR-647     |                                       |
| 46 | 0.0147756 | hsa-let-7d*     | 0.010                                 |
| 47 | 0.0149911 | hsa-miR-361-3p  | 0.014                                 |
| 48 | 0.015098  | hsa-miR-148b    |                                       |
| 49 | 0.0152728 | hsa-miR-519d    | 0.018                                 |
| 50 | 0.0155654 | hsa-miR-147b    | 0.012                                 |
| 51 | 0.0164334 | hsa-miR-127-5p  |                                       |
| 52 | 0.0164888 | hsa-miR-513a-3p |                                       |
| 53 | 0.0167608 | ebv-miR-BART16  |                                       |
| 54 | 0.0172065 | hsa-miR-541*    |                                       |
| 55 | 0.0174408 | hsa-miR-220c    |                                       |
| 56 | 0.0178302 | hsa-miR-19a*    |                                       |
| 57 | 0.0181837 | hsa-miR-1227    |                                       |
| 58 | 0.0187268 | hsa-miR-877*    | 0.011                                 |
| 59 | 0.0188954 | hiv1-miR-H1     |                                       |
| 60 | 0.0189004 | hsa-miR-665     | 0.007                                 |
| 61 | 0.0197618 | hsa-miR-1224-3p |                                       |
| 62 | 0.0200971 | hsa-miR-583     |                                       |
| 63 | 0.0216875 | hsa-miR-1234    |                                       |

|     |           |                  |       |
|-----|-----------|------------------|-------|
| 64  | 0.0224265 | ebv-miR-BART12   |       |
| 65  | 0.0225453 | hsa-miR-195*     |       |
| 66  | 0.0227889 | hsa-miR-576-3p   |       |
| 67  | 0.0228041 | hsa-miR-505      |       |
| 68  | 0.0228584 | hsa-miR-491-3p   |       |
| 69  | 0.0230689 | hsa-miR-21       |       |
| 70  | 0.0231108 | hsa-miR-485-3p   | 0.050 |
| 71  | 0.0233026 | hsa-miR-379      |       |
| 72  | 0.0236046 | ebv-miR-BART4    |       |
| 73  | 0.0237171 | hsa-miR-936      |       |
| 74  | 0.0238543 | hsa-miR-150      |       |
| 75  | 0.0239443 | hcmv-miR-US33-5p |       |
| 76  | 0.0241107 | hsa-miR-877      |       |
| 77  | 0.024933  | hsa-miR-34c-3p   | 0.015 |
| 78  | 0.0250813 | hsa-miR-568      |       |
| 79  | 0.0251949 | hsa-miR-591      |       |
| 80  | 0.0259423 | hsa-miR-24-2*    |       |
| 81  | 0.0260741 | hsa-miR-138-1*   | 0.019 |
| 82  | 0.0262455 | hsa-miR-124      |       |
| 83  | 0.0264199 | hsa-let-7f-1*    |       |
| 84  | 0.0266024 | hsa-miR-548a-5p  |       |
| 85  | 0.0269459 | hsa-miR-331-5p   |       |
| 86  | 0.0270912 | hsa-miR-370      | 0.032 |
| 87  | 0.027329  | hsa-miR-432*     |       |
| 88  | 0.0275364 | hsa-miR-801      |       |
| 89  | 0.0278639 | hsa-miR-619      |       |
| 90  | 0.0284337 | hsa-miR-596      |       |
| 91  | 0.0288385 | hsa-miR-346      |       |
| 92  | 0.0292078 | hsa-miR-298      |       |
| 93  | 0.0298192 | hsv1-miR-H1      |       |
| 94  | 0.0307524 | hsa-miR-595      | 0.047 |
| 95  | 0.0315629 | hsa-miR-188-5p   |       |
| 96  | 0.0318739 | hsa-miR-1229     |       |
| 97  | 0.0330309 | hsa-miR-559      |       |
| 98  | 0.0332991 | hsa-miR-202      |       |
| 99  | 0.0333392 | hsa-miR-769-3p   | 0.018 |
| 100 | 0.0345424 | hsa-miR-450b-3p  |       |
| 101 | 0.0347605 | hsa-miR-601      |       |
| 102 | 0.0348334 | hsa-miR-374a     | 0.028 |
| 103 | 0.0352984 | hsa-miR-505*     |       |
| 104 | 0.0357871 | hsa-miR-125b-2*  |       |
| 105 | 0.0360823 | hsa-miR-377      |       |
| 106 | 0.0362854 | hsa-miR-497*     |       |
| 107 | 0.0368766 | hsa-miR-486-5p   |       |
| 108 | 0.0376461 | hsa-miR-135a*    | 0.007 |
| 109 | 0.0377047 | hsa-miR-524-3p   |       |
| 110 | 0.0381224 | hsa-miR-1237     |       |
| 111 | 0.0396401 | hcmv-miR-US25-1* |       |
| 112 | 0.0396576 | kshv-miR-K12-5   | 0.002 |
| 113 | 0.0397365 | hcmv-miR-US4     |       |
| 114 | 0.0399097 | hsa-miR-631      | 0.014 |
| 115 | 0.0401945 | hsa-miR-302c*    |       |
| 116 | 0.0405331 | hsa-miR-33a*     |       |
| 117 | 0.0409338 | hsa-miR-562      |       |
| 118 | 0.0413832 | hsa-miR-337-5p   |       |
| 119 | 0.041578  | hsa-miR-622      |       |
| 120 | 0.0426621 | hsa-miR-887      |       |
| 121 | 0.0436787 | hsa-miR-342-5p   |       |
| 122 | 0.044647  | hsa-miR-218-1*   |       |
| 123 | 0.0454624 | hsa-miR-518c*    |       |
| 124 | 0.0465232 | hsa-miR-216a     |       |
| 125 | 0.0465537 | kshv-miR-K12-7   | 0.016 |
| 126 | 0.0471248 | hsa-miR-222      |       |
| 127 | 0.0481171 | hsa-miR-609      |       |
| 128 | 0.0488147 | ebv-miR-BART10   |       |
| 129 | 0.0493661 | hsa-miR-28-5p    | 0.031 |
